# Supplementary material for: Direct and Indirect Targeting of PP2A by Conserved Bacterial Type-III Effector Proteins
Source: PubMed Central journal article supplement (PMC4871590; doi:10.1371/journal.ppat.1005609), 2016-05-18
Supplement: ppat.1005609.s014.pdf [file ppat.1005609.s014.pdf]

**Table S2. Primers used in this study.**

| <b>Name</b>                            | <b>Sequence (5'-3')</b>                  |
|----------------------------------------|------------------------------------------|
| <b>RT-PCR primers</b>                  |                                          |
| <i>B' alpha</i> FP                     | 5'-GATTGCTCGATGCCTCAGTAG-3'              |
| <i>B' alpha</i> RP                     | 5'-ACCGTGTACCGCTTGGTTCCA-3'              |
| <i>B' beta</i> FP                      | 5'-CACAGCCTGTCGAGTTCCAGC-3'              |
| <i>B' beta</i> RP                      | 5'-CCCACAATGTGCTCGTTGTTTC-3'             |
| <i>B' iota</i> FP                      | 5'-AGAAGCAATGAGTGTGATGGAGT-3'            |
| <i>B' iota</i> RP                      | 5'-GTAGGATGGCTTGCCGTTA-3'                |
| <i>B' delta</i> FP                     | 5'-CGCCAAATTGCTCAGTGCTT-3'               |
| <i>B' delta</i> RP                     | 5'-TCCAATGGCTGCTACCGTTT-3'               |
| <i>B' epsilon</i> FP                   | 5'-TGAGAGAGGAGCATAGGCTGT-3'              |
| <i>B' epsilon</i> RP                   | 5'-GCGGATCACAGTATCAGCCA-3'               |
| <i>B' eta</i> FP                       | 5'-TGCCTTAGACCTGGAGGAGG-3'               |
| <i>B' eta</i> RP                       | 5'-AGCCAGCTTGGTGTGCTAGTTT-3'             |
| <i>B' theta</i> FP                     | 5'-CCAAGTTGCTCGGTGTTTGAACAGT-3'          |
| <i>B' theta</i> RP                     | 5'-AGCTTGGTTCCAATGCTTCTGAGTG-3'          |
| <i>B' gamma</i> FP                     | 5'-TTCGTCAAATCGCTAGATGCCTCA-3'           |
| <i>B' gamma</i> RP                     | 5'-CGGGAACACAATGGGCATTATCAC-3'           |
| <i>B' zeta</i> FP                      | 5'-GCCGCTGAGTTTCAACGTTGTATGG-3'          |
| <i>B' zeta</i> RP                      | 5'-CACGCGTGTCTCTCAAGAGCTG-3'             |
| <i>PR-1</i> FP                         | 5'-GAACATGTGGGTTAGCGAGAAG-3              |
| <i>PR-1</i> RP                         | 5'-GTTACATAATTCCCACGAGGA-3               |
| <i>actin7</i> FP                       | 5'-CAGTGTCTGGATCGGAGGAT-3'               |
| <i>actin7</i> RP                       | 5'-TGAACAATCGATGGACCTGA-3'               |
| <b>Genotyping primers</b>              |                                          |
| <i>rcn1-6</i> FP                       | 5'-GTCAAGTACCTCACCTATAAC-3'              |
| <i>rcn1-6</i> RP                       | 5'-CATAGCCAGCAACCAAAATGG-3'              |
| <i>a2</i> FP                           | 5'-CTACCGAATGACCATTTTGCG-3'              |
| <i>a2</i> RP                           | 5'-GCAAGACAATGGACAAAACCC-3'              |
| <i>a3</i> FP                           | 5'-GTCTCATTCTCGTTCTTCTG-3'               |
| <i>a3</i> RP                           | 5'-CTCAACCCCTCCTACATACAG-3'              |
| <i>b' alpha</i> FP                     | 5'-CCGAGCGTCAATCCTTGTTTC-3'              |
| <i>b' alpha</i> RP                     | 5'-TGAGGCATCGAGCAATCTGTT-3'              |
| <i>b' beta</i> FP                      | 5'-CGTGTACTCCGAGAAGATCTC-3'              |
| <i>b' beta</i> RP                      | 5'-CAGCAATTCTGAAGTTTCCTC-3'              |
| <i>b' eta</i> FP                       | 5'-GAGCTATTTGGCGAAACAGTG-3'              |
| <i>b' eta</i> RP                       | 5'-TCCAAAAGCACTGATAATGGC-3'              |
| <i>b' theta</i> FP                     | 5'-AAACTCAGCAATCCCATTGTG-3'              |
| <i>b' theta</i> RP                     | 5'-ATCGGAGGTGTTGTAATGTGC-3'              |
| <i>b' gamma</i> FP                     | 5'-TTGTCTCCAGGTTCAACAACC-3'              |
| <i>b' gamma</i> RP                     | 5'-AACACAGCCCTGCATGTAGAC-3'              |
| <i>b' zeta</i> FP                      | 5'-CACTCGTCGAAAAGAACTTGG-3'              |
| <i>b' zeta</i> RP                      | 5'-CCGAATCTCTTATCGGGAAG-3'               |
| LBa1 (Salk line T-DNA specific primer) | 5'-TGGTTCACGTAGTGGGCCATCG-3'             |
| LB1 (Sail line T-DNA specific primer)  | 5'-GCCTTTTCAGAAATGGATAAATAGCCTTGCTTCC-3' |

Continued

Table S2 continued

|                                   |                                                                 | Restriction enzyme | Note                |
|-----------------------------------|-----------------------------------------------------------------|--------------------|---------------------|
| <b>Cloning primers</b>            |                                                                 |                    |                     |
| <u>For pMDC43</u>                 |                                                                 |                    |                     |
| B' alpha FP                       | 5'-ACTAGTATGTTTAAGAAGATCATGAA -3'                               | SpeI               |                     |
| B' alpha RP                       | 5'-AGGCCTCTAAGAAGTGATCATAGGAT -3'                               | StuI               |                     |
| WIP2 FP                           | 5'- CACCGACTAGTATGTGTGCCATCAACCTG -3'                           | SpeI               |                     |
| WIP2 RP                           | 5'- CACCGAGGCCTCTAGATCATGGGGCGATC -3'                           | StuI               |                     |
| AvrE1-N' FP (aa 1-898)            | 5'-ACTAGTGTGCAGTCACCATCGATCCA -3'                               | SpeI               |                     |
| AvrE1-N' RP                       | 5'-GGATCCTTATGCGGTGTTTTGTAGA -3'                                | BamHI              | Stop codon added    |
| AvrE1-M' FP (aa 585-1400)         | 5'-ACTAGTGTGAACCTGACCAATGCGCT -3'                               | SpeI               | start codon added   |
| AvrE1-M' RP                       | 5'-GGATCCTTAGGGGTCGGCATTGGGGT -3'                               | BamHI              | Stop codon added    |
| AvrE1-C' FP (aa 889-1795)         | 5'-ACTAGTGTGATCCGCGCCAACATCTA -3'                               | SpeI               | start codon added   |
| AvrE1-C' RP                       | 5'-GGATCCTTAGCTCTTCAGTTTGAACC -3'                               | BamHI              |                     |
| AvrE1 full length FP              | 5'-ACTAGTGTGCAGTCACCATCGATCCA -3'                               | SpeI               |                     |
| AvrE1 full length RP              | 5'-GGATCCTTAGCTCTTCAGTTTGAACC -3'                               | BamHI              |                     |
| AvrE1-C' k1k2 FP (KK1787-88AA)    | 5'-ACTAGTGTGATCCGCGCCAACATCTA -3'                               | SpeI               | start codon added   |
| AvrE1-C' k1k2 RP                  | 5'-TACCGAGCTCTTAGCTCTTCAGTTTGAACCCCTCTG<br>CCGCCAAGTCGCCAGCC-3' | SacI               |                     |
| HopQ1-1 FP                        | 5'-TCGCCCTTCTGCAGACTAGTATGCATCGTCTATCA<br>CCGC-3'               |                    |                     |
| HopQ1-1 RP                        | 5'-CCTTAGGCCTGAGCTCATCTGGGGCTACCGTCGAC-3'                       |                    |                     |
| <u>For pCsVMV-HA3-N-1300</u>      |                                                                 |                    |                     |
| AvrE1-N' FP (aa 1-898)            | 5'-GCTAGTCTAGAATGCAGTCACCATCGATC -3'                            | XbaI               |                     |
| AvrE1-N' RP                       | 5'-CACGCGGATCCTGCGGTGTTTTGTAGAT -3'                             | BamHI              |                     |
| AvrE1-M' FP (aa 585-1400)         | 5'-GCTAGTCTAGAATGAACCTGACCAATGCG -3'                            | XbaI               | start codon added   |
| AvrE1-M' RP                       | 5'-CACGCGGATCCGGGGTCGGCATTGGGGT -3'                             | BamHI              |                     |
| AvrE1-C' FP (aa 889-1795)         | 5'-GCTAGTCTAGAATGATCCGCGCCAACATC -3'                            | XbaI               | start codon added   |
| AvrE1-C' RP                       | 5'-CACGCGGATCCGCTCTTCAGTTTGAACCC -3'                            | BamHI              | Stop codon excluded |
| AvrE1-C' k1k2 FP (KK1787-88AA)    | 5'-GCTAGTCTAGAATGATCCGCGCCAACATC -3'                            | XbaI               | start codon added   |
| AvrE1-C' k1k2 RP                  | 5'-TACCGGATCCGCTCTTCAGTTTGAACCCCTCT<br>GCCGCCAAGTCGCCAGCC -3'   | BamHI              | Stop codon excluded |
| <u>Complementation constructs</u> |                                                                 |                    |                     |
| B' alpha FP                       | 5'-CATGCAGTCGACTCCTTGGAAATTTTGTATGGGAAGA -3'                    | Sall               |                     |
| B' alpha RP                       | 5'-CATGCAGCGGCCGCGAGAAGTGATCATAGGATCTTC -3'                     | NotI               | Stop codon excluded |
| B' beta FP                        | 5'-CATGCAGTCGACATAGTCTCCTACTCCATTACA -3'                        | Sall               |                     |
| B' beta RP                        | 5'-CATGCAGCGGCCGCGGAAGTGATCATATGATCTTC -3'                      | NotI               | Stop codon excluded |
